# Supplementary material
Source: Springer Nature journal article supplement (https://www.springermedizin.de/resource/supplementary/13002_2012_298_MOESM3_ESM.pdf/9627572)

**Level of analysis**

**Causal factors**

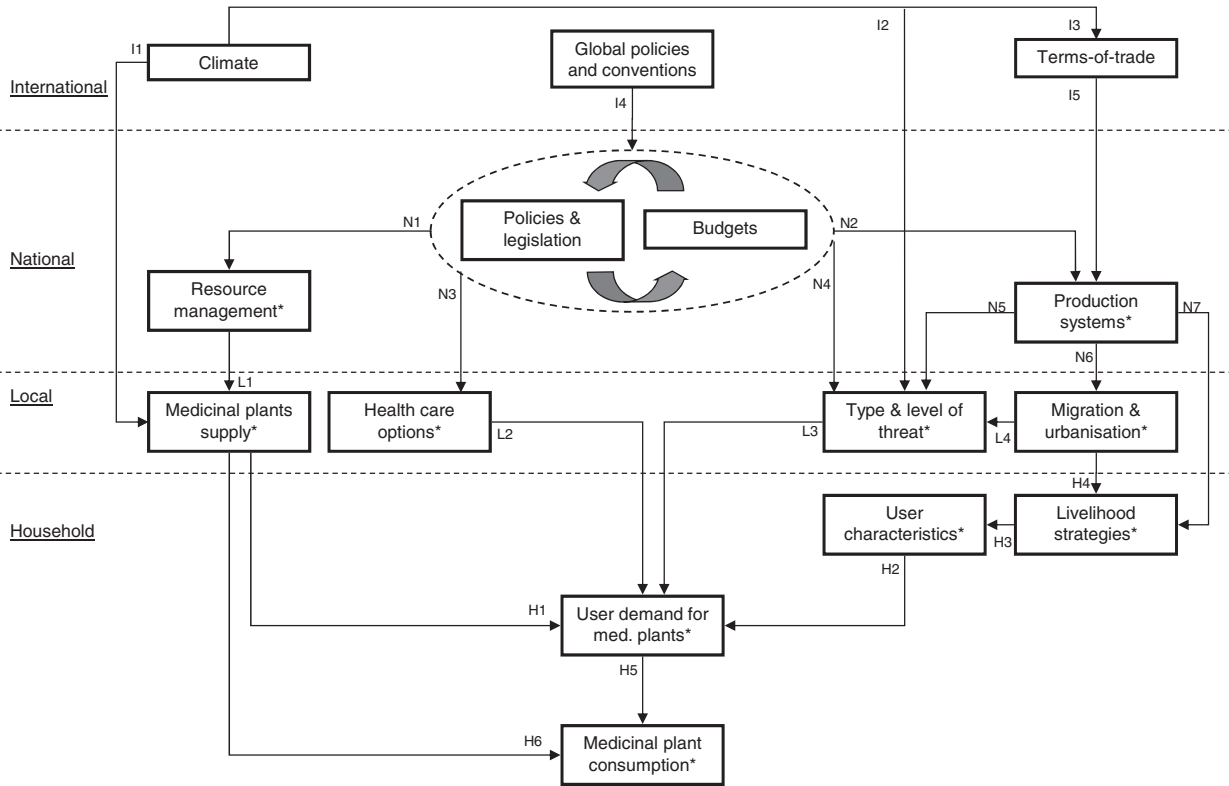

Supplement: MOESM3 [file 9627572]
